# Supplementary material for: Effects of light qualities on the growth and porphyra-334 (a mycosporine-like amino acid) biosynthesis capacity of Effrenium voratum
Source: Research Square preprint supplement (doi:10.21203/rs.3.rs-8597573/v1), 2026-01-28
Supplement: Supplementary file 1 [file 0d90846be56085ccf852bf1c.pdf]

**Article title:** Effects of light qualities on the growth and porphyrin-334 (a mycosporine-like amino acid) biosynthesis capacity of *Effrenium voratum*

**Journal name:** Journal of Applied Phycology

**Correspondence:** Yongfu Li, Jiangsu Province Engineering Research Center for Marine Bioresources Sustainable Utilization, Key Laboratory of Marine Hazards Forecasting, Ministry of Natural Resources, College of Oceanography, Hohai University, 1 Xikang Road, Gulou District, Nanjing 210024, China. Email: liyongfu@hhu.edu.cn

**Table S1. Biological significances of the parameters involved in the JIP-test (Strasser et al. 2004)**

| Parameter | Biological significance                                                                                               |
|-----------|-----------------------------------------------------------------------------------------------------------------------|
| $F_V/F_M$ | Maximum quantum yield of primary photochemistry (at $t = 0$ )                                                         |
| $M_0$     | Approximated initial slope ( $\text{ms}^{-1}$ ) of the fluorescence transient $V = f(t)$                              |
| $S_m$     | Normalized total complementary area above the O-J-I-P transient (reflecting multiple-turnover $Q_A$ reduction events) |
| $ABS/RC$  | Absorption flux per RC                                                                                                |
| $TR_0/RC$ | Trapped energy flux per RC (at $t = 0$ )                                                                              |
| $ET_0/RC$ | Electron transport flux per RC (at $t = 0$ )                                                                          |
| $DI_0/RC$ | Dissipated energy flux per RC (at $t = 0$ )                                                                           |

**Table S2. Biological significances of the parameters involved in the modulated chlorophyll fluorescence and RLC measurements (Ralph and Gademann 2005)**

| Parameter        | Biological significance                                               |
|------------------|-----------------------------------------------------------------------|
| ETR              | Electron transport rate                                               |
| F <sub>m</sub>   | Maximum fluorescence yield in the dark-adapted state                  |
| F <sub>m</sub> ' | Maximum fluorescence yield in the light-adapted state                 |
| NPQ              | Non-photochemical quenching                                           |
| PAR              | Photosynthetic active radiation                                       |
| P <sub>max</sub> | Namely rETR <sub>max</sub> (maximum relative electron transport rate) |
| $\alpha$         | Photosynthetic rate in light-limited region of RLC                    |
| $\beta$          | Photoinhibition                                                       |
| I <sub>k</sub>   | Semi-light saturation point                                           |

**Table S3. *E. voratum* genes involved in the qRT-PCR analysis and their primers**

| Gene        | Gene ID             | Forward primer (5' to 3') | Reverse primer (3' to 5') |
|-------------|---------------------|---------------------------|---------------------------|
| <i>COX</i>  | OP004348.1          | TGGACTTTATATCCACCATT      | AAGACTTCCAAGAAGAGAA       |
|             |                     | ATCCAC                    | ATAGATGAC                 |
| <i>DHQS</i> | EVORT383_LOCUS16934 | TCGTTGCCGCCTTCTTCTTG      | GCTCGCCGTGACAAATGGAA      |
|             |                     |                           | T                         |
| <i>OMT</i>  | EVOR1521_LOCUS26624 | ATATTGCCCGATGCCTACGA      | CTATGGCTGCTGTGGCTTTG      |
|             |                     | G                         | T                         |
| <i>NRPS</i> | EVOC421_LOCUS32180  | GGATTTGGACCCGTCAGTGT      | AGACCGGAAGGCTATGAAG       |
|             |                     | TT                        | CAG                       |

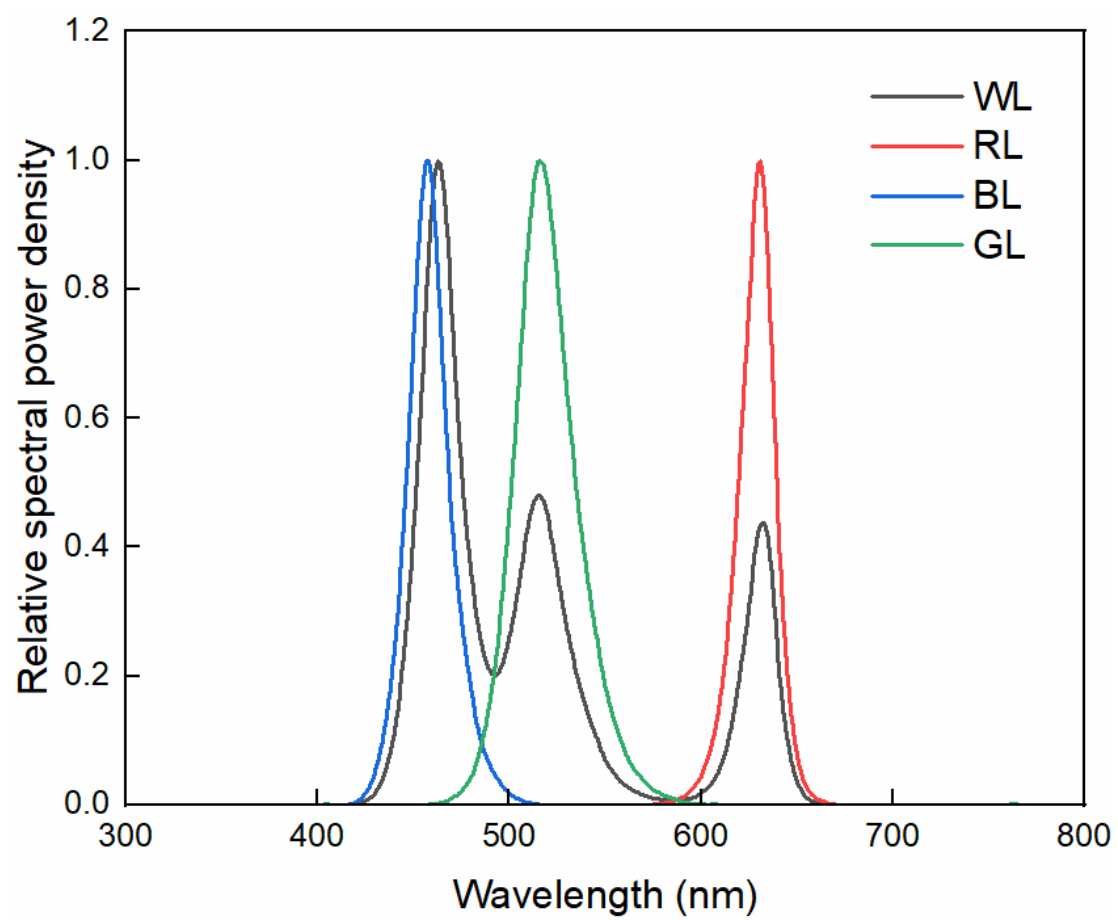

Fig. S1 Spectra of different light qualities

A

Results of KEGG pathway enrichment (RL vs. WL)

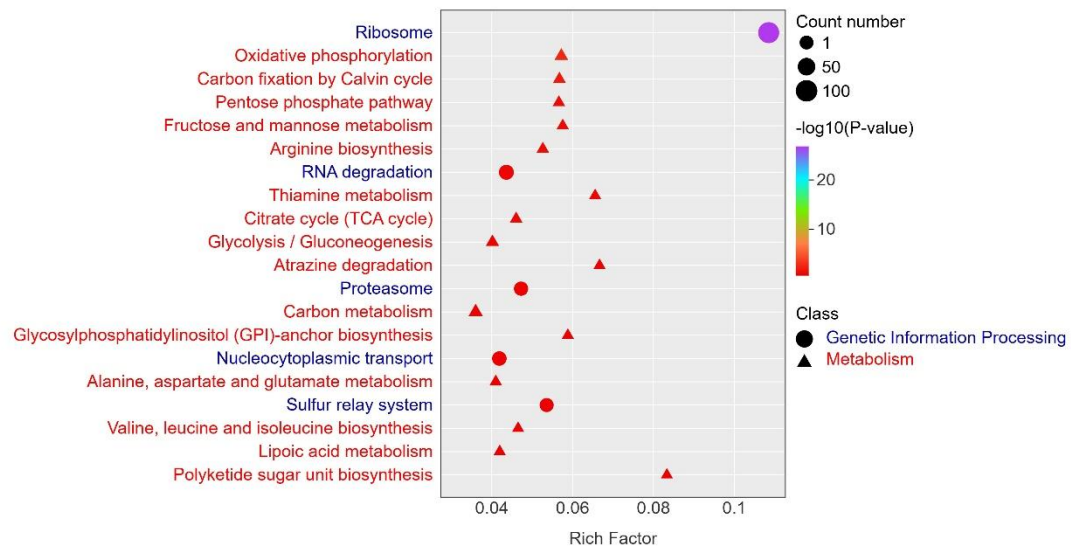

B

Results of KEGG pathway enrichment (BL vs. WL)

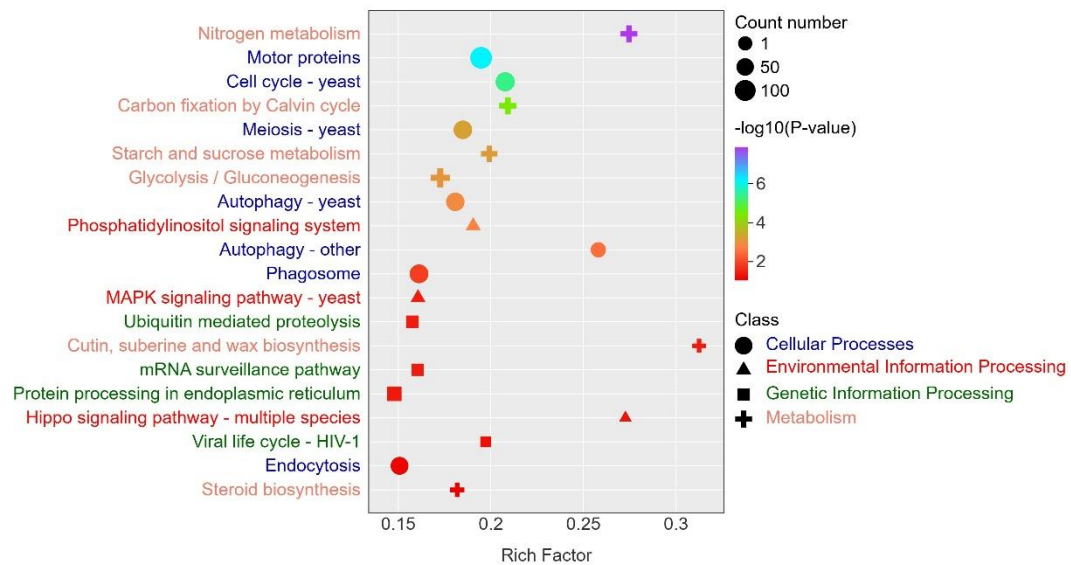

C

## Results of KEGG pathway enrichment (GL vs. WL)

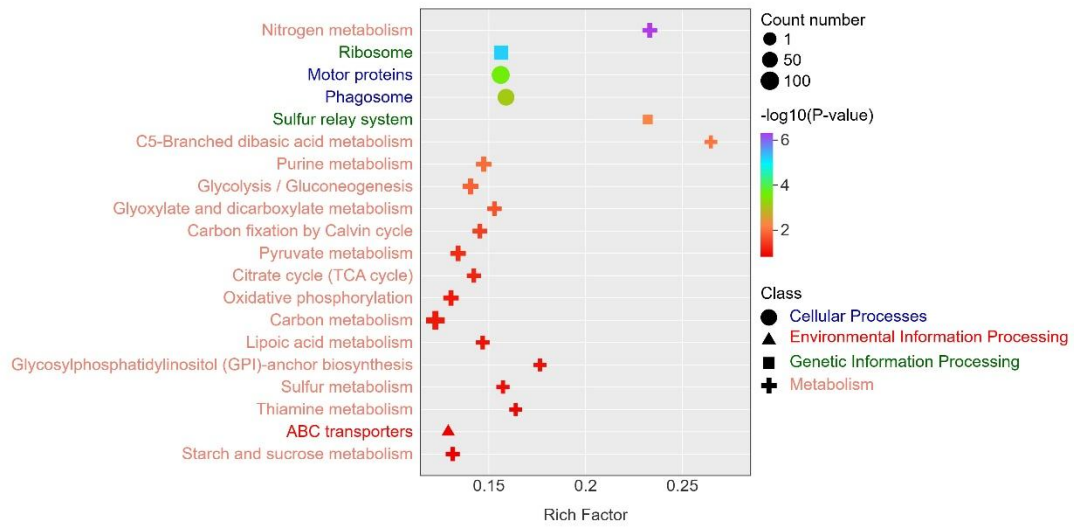

D

## Results of KEGG pathway enrichment (BL vs. RL)

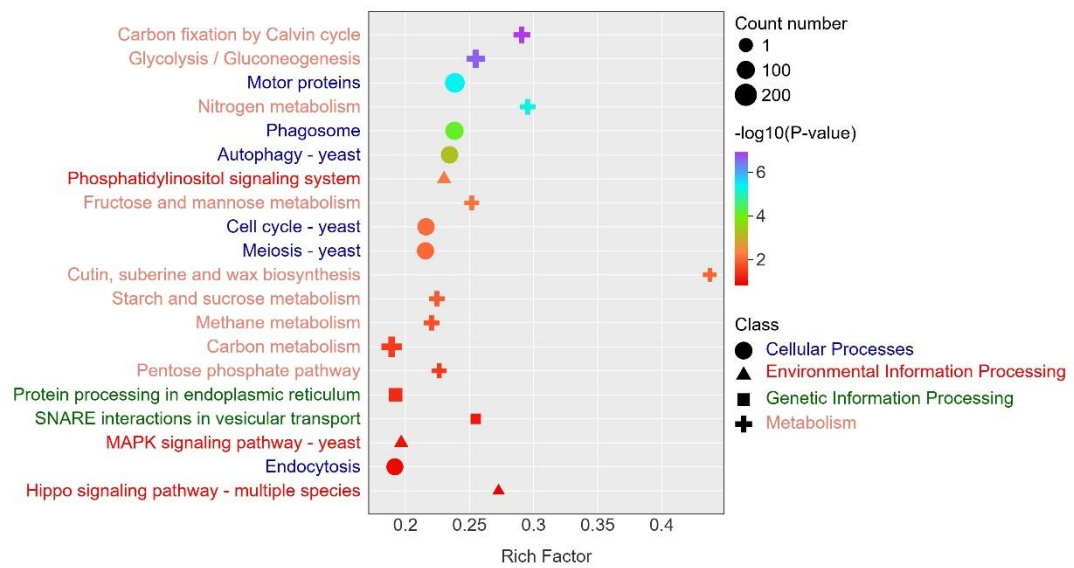

E

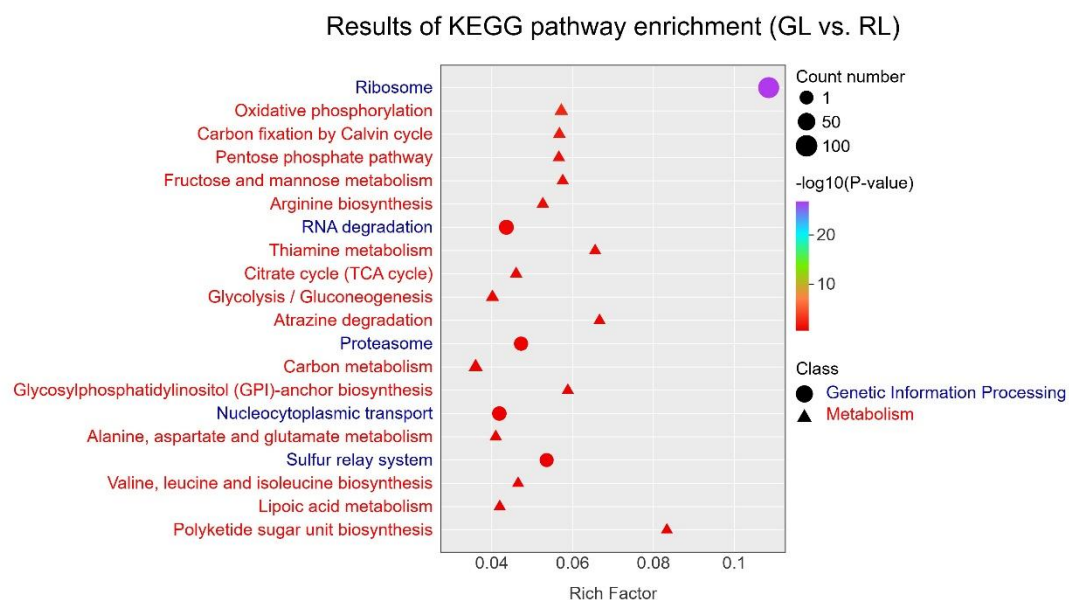

F

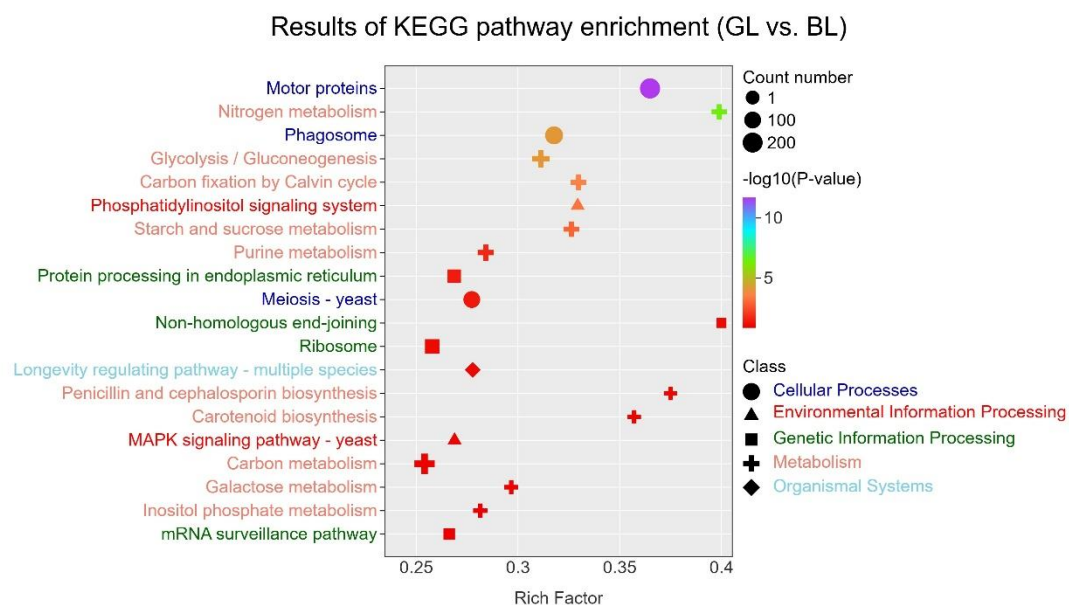

**Fig. S2 Results of KEGG pathway enrichment.** Rich Factor is proportional to the level of enrichment; the symbol size is proportional to the number of the DEGs enriched on the pathway involved;  $-\log_{10}(\text{P-value})$  is proportional to the significance of enrichment.





A

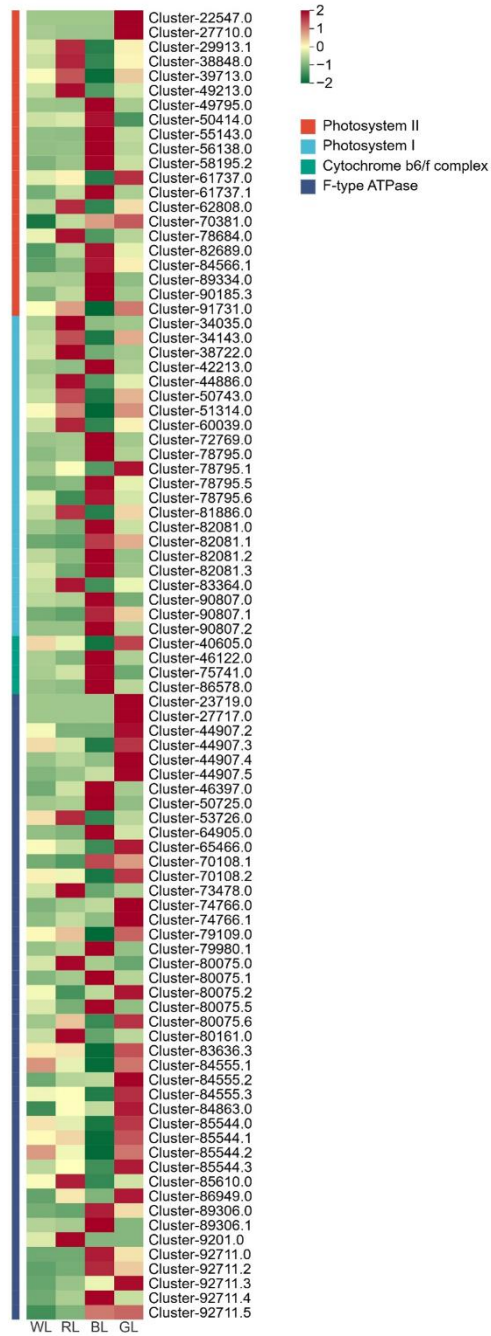

B

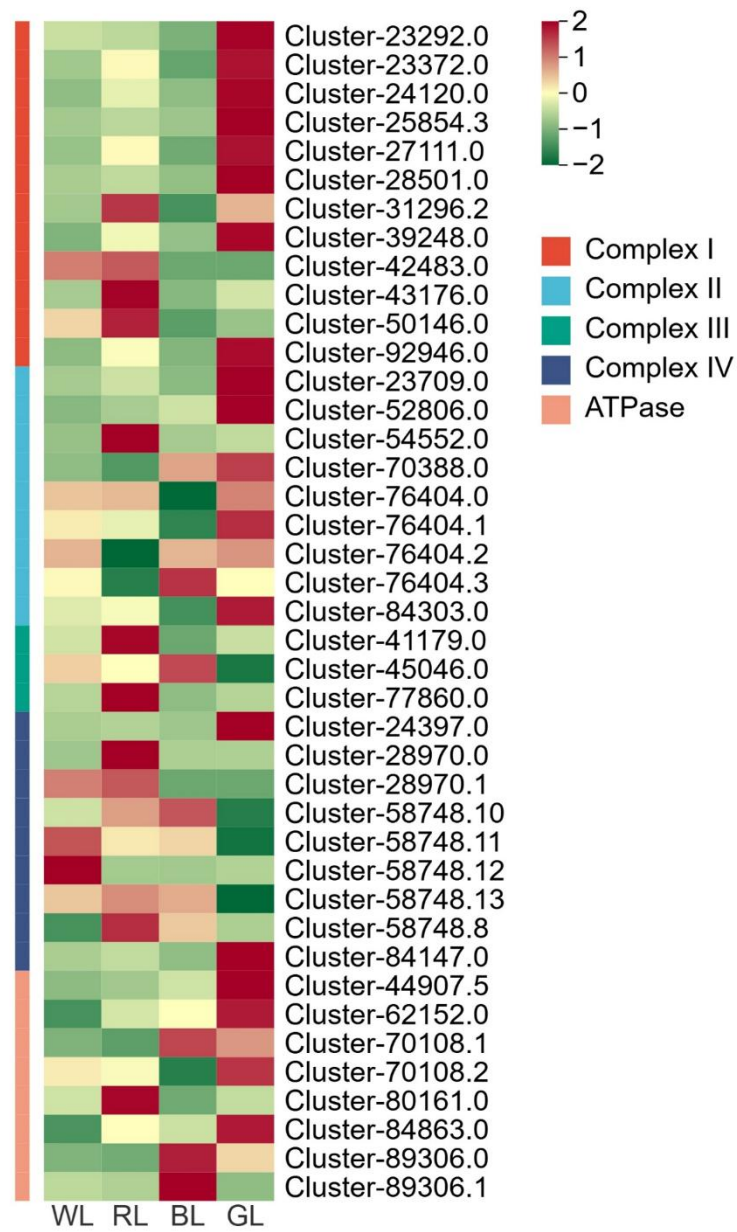

C

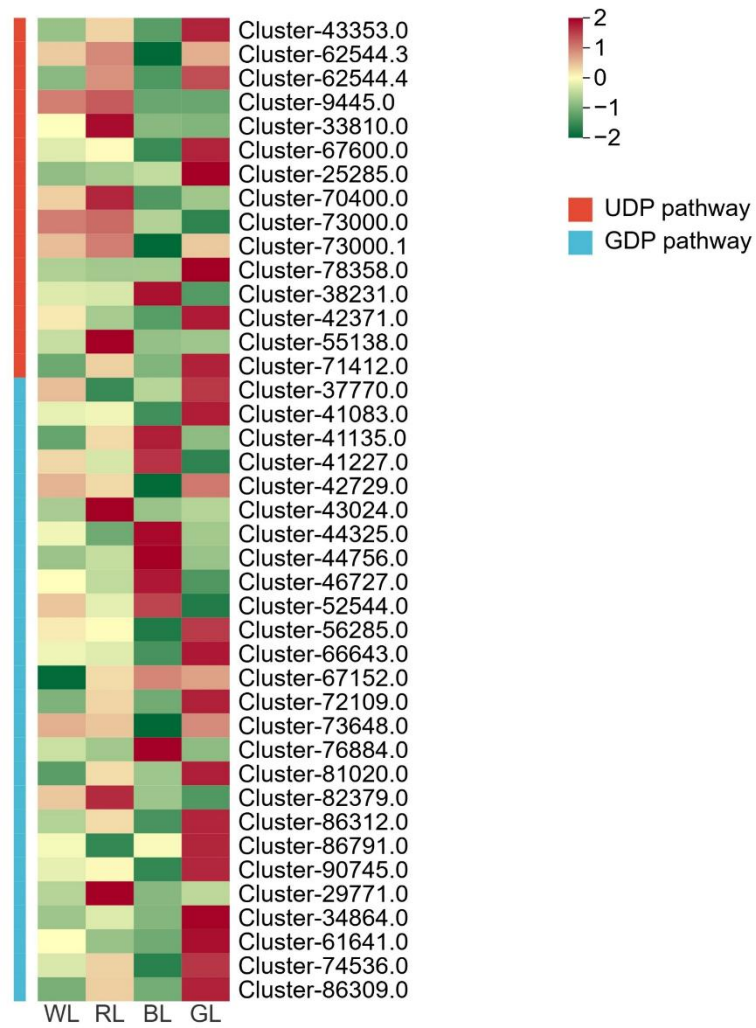

D

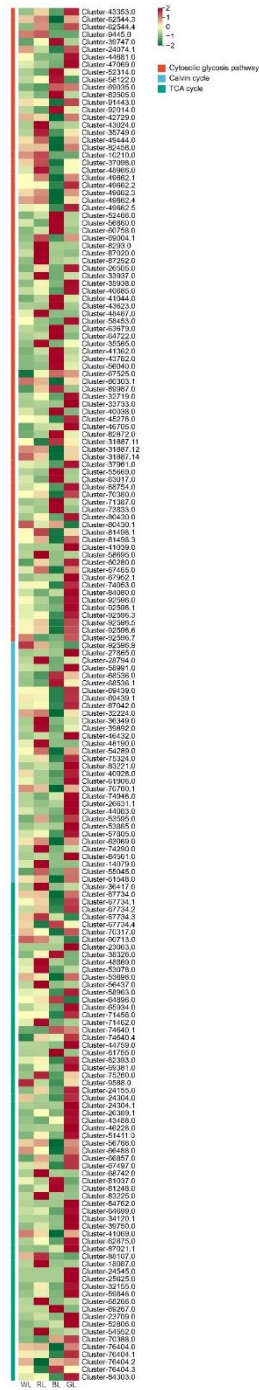

E

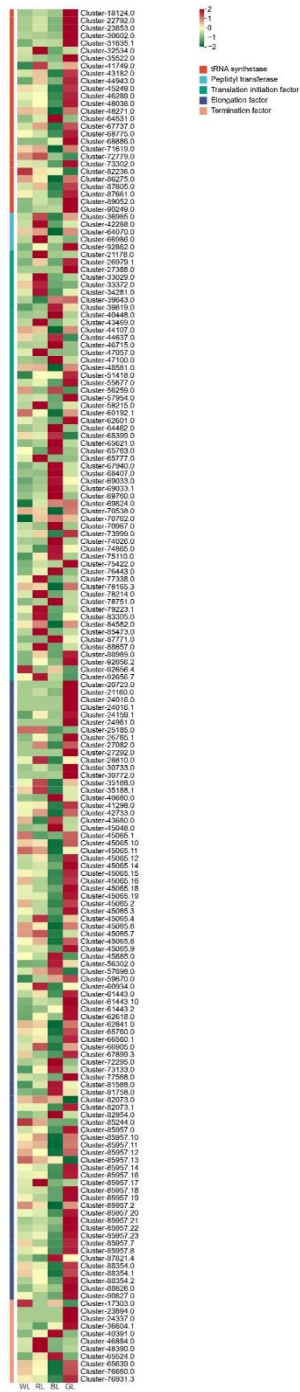

F

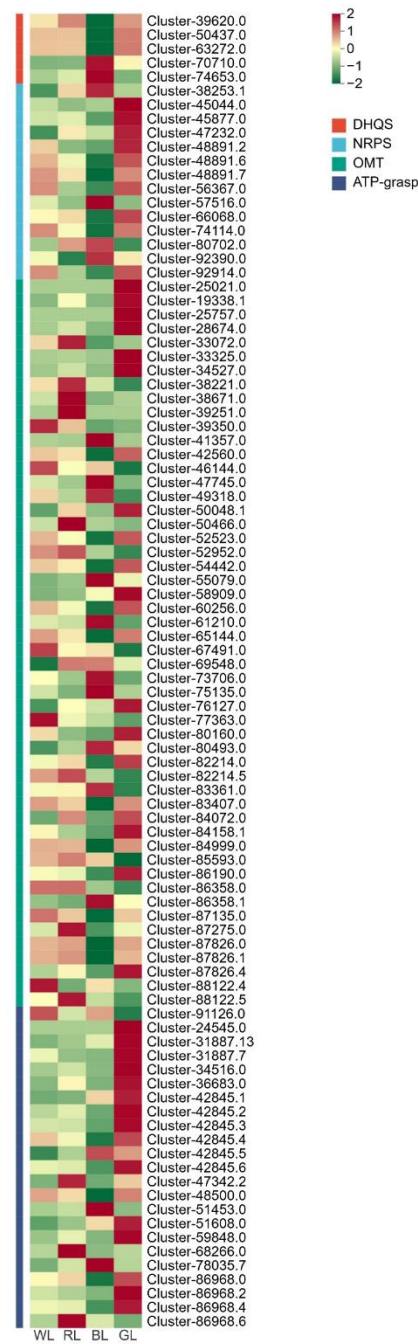

**Fig. S3 DEG enrichment in *E. voratum* under different light qualities. A. Heat map of photosynthesis-related DEGs; B. Heat map of respiration-related DEGs; C. Heat map of polysaccharide synthesis-related DEGs; D. Heat map of lipid synthesis-related DEGs; E. Heat map of protein synthesis-related DEGs; F. Heat map of porphyrin-334 synthesis-related DEGs**
